# Supplementary material for: Pyrrolic N-doped carbon materials for the electrosynthesis of H2O2 through the oxygen reduction reaction
Source: Royal Society of Chemistry journal article supplement (doi:10.1039/d4nj04648j), 2025-01-01
Supplement: d4nj04648j1.pdf [file d4nj04648j1.pdf]

Electronic Supplemental Information for

**Pyrrolic N doped carbon materials for the electrosynthesis of H<sub>2</sub>O<sub>2</sub> through  
oxygen reduction reaction**

Wenhui Yu, Chuanqi Fei, Jingyi Wang, Ruifen Tian\*, and Yinling Wang\*

*Anhui Province Key Laboratory of Biomedical Materials and Chemical Measurement, College of  
Chemistry and Materials Science, Anhui Normal University, Wuhu, 241000, PR China*

**Corresponding Author**

\* E-mail: [rebecca@mail.ahnu.edu.cn](mailto:rebecca@mail.ahnu.edu.cn) (R. Tian), [wangyl@mail.ahnu.edu.cn](mailto:wangyl@mail.ahnu.edu.cn) (Y.L. Wang)

## Experimental Section

**Materials and Reagents:** Carbazole ( $C_{12}H_9N$ ) was purchased from Aladdin Reagent (Shanghai) Co., LTD and carboxylated carbon nanotubes (O-CNT) was bought from Chengdu Organic Chemistry Co., Ltd, Chinese Academy of Sciences. Nafion-117 membrane and carbon paper (Toray, TGP-H-060) were obtained from Tianjin Incole Union Technology Co., Ltd. and Suzhou Shengernuo Technology Co., Ltd., respectively. The ultra-pure water ( $\geq 18.2 \text{ M } \Omega \text{ cm}, 25 \text{ }^\circ\text{C}$ ) was used throughout the whole experiment.

**Synthesis of P-CZ/O-CNT-500:** Typically, 100 mg of carbazole ( $C_{12}H_9N$ ) and 100 mg of carboxylated carbon nanotubes (O-CNT) were grinded evenly in a mortar. Then the mixture of carbazole and O-CNT was transferred to a porcelain boat and put into a tube furnace. The temperature in the tube furnace rose from room temperature to  $250 \text{ }^\circ\text{C}$  and kept for one hour, then continued to rise to  $500 \text{ }^\circ\text{C}$  and kept for another hour. The heating rate was  $5 \text{ }^\circ\text{C} / \text{min}$  and the Ar gas was full of the tube furnace during the whole pyrolysis process. The corresponding product was named P-CZ/O-CNT-500. When the temperature in the second step became  $800 \text{ }^\circ\text{C}$ , the product was called P-CZ/O-CNT-800.

For comparison, pure carboxylated carbon nanotubes (O-CNT) without carbazole underwent the same pyrolysis process and the corresponding product was recorded as P-O-CNT-500.

**Material characterization:** Field emission scanning electron microscope (SEM, Hitachi8100) and transmission electron microscope (TEM, Hitachi7700) were applied to characterize the morphology and microstructure of the materials. X-ray photoelectron spectroscopy (XPS, ThermoScientific, US, AlK  $\alpha$  radiation) was used to analyze the element composition of the materials. In addition, the materials were also characterized by UV-vis spectrophotometer (UV2450), infrared (IR, Invenio) and Raman (inVia) spectroscopy.

**Electrochemical test:** All the electrochemical tests were carried out on the electrochemical workstation (CHI730E, Shanghai Chenhua) with a typical three-electrode system. The reference electrode, counter electrode and the working electrode were Ag/AgCl, carbon rod electrode and rotating ring-disk electrode (RRDE,  $d = 5 \text{ mm}$ ), respectively. Without special instructions, the rotation speed of the RRDE is 1600

rpm. For all the samples tested, the catalyst ink with a concentration of 5 mg/mL was prepared by dispersing 5 mg of sample in the mixed solution of 800  $\mu$ L of ultra-pure water, 200  $\mu$ L of isopropanol and 5  $\mu$ L of Nafion (5 wt%). Before the electrochemical test, the working electrode was polished with alumina powder (0.05  $\mu$ m), cleaned with ethanol and dried naturally. Then, 10  $\mu$ L of catalyst ink was dripped onto the working electrode and dried at 37  $^{\circ}$ C in a drying oven for 30 minutes.

The oxygen reduction reaction (ORR) activity of the catalysts was evaluated by linear sweep voltammetry (LSV) in oxygen-saturated 0.1M phosphate buffered saline (PBS, pH = 7) with a scan rate of 10 mV/s. Before the LSV test, the working electrode was activated by cyclic voltammetry (CV) with a scan rate of 100 mV/s until the CV curves were stable. All the measured potentials are converted to the reversible hydrogen electrode potential (RHE) according to the following formula:  $E_{RHE} = E_{Ag/AgCl} + 0.197 + 0.0591\text{pH}$ .

For the RRDE test, the potential on the platinum ring was 1.20 V (vs. RHE). The selectivity of hydrogen peroxide ( $H_2O_2$ , %) and electron transfer number of hydrogen peroxide ( $n$ ) can be calculated using the following formula:

$$H_2O_2 (\%) = 200 \times \frac{\frac{I_R}{N}}{\frac{I_R}{N} + I_D} \quad (1-1)$$

$$n = 4 \times \frac{\frac{I_R}{N}}{\frac{I_R}{N} + I_D} \quad (1-2)$$

Where  $I_D$  and  $I_R$  are disk current and ring disk current respectively, and  $N$  is the current collection efficiency of Pt ring ( $N = 0.37$ ).

The electrochemical active surface area (ECSA) of catalysts was reflected by a double layer capacitance ( $C_{dl}$ ) which was calculated based on a series of CV curves in the non-faradaic region at the scan rates of 10, 20, 30, 40 and 50 mV s $^{-1}$ .

Hydrogen peroxide ( $H_2O_2$ ) was electrochemically synthesized via potentiostatic method in an H-type electrolytic cell using Nafion-117 membrane separating the cathode from the anode. The counter electrode was carbon paper (1x1 cm $^{-2}$ ), which was cleaned with 0.1 M HCl, acetone and ethanol solution in sequence by ultrasonic wave for 15 minutes and then dried at 60  $^{\circ}$ C for 3 h. The working electrode was the carbon paper pretreated above and coated with P-CZ/O-CNT-500 or the control sample with a mass loading of 0.25 mg cm $^{-2}$  (unless explicitly stated). The reference electrode was Ag/AgCl electrode. The electrolyte in the cathode was 46 mL of 0.1 M PBS with a pH of 7 and saturated with  $O_2$ .

The concentration of H<sub>2</sub>O<sub>2</sub> was analyzed by cerium sulfate method based on the equation below: 2Ce<sup>4+</sup> + H<sub>2</sub>O<sub>2</sub> = 2Ce<sup>3+</sup> + O<sub>2</sub> + 2H<sup>+</sup>. After reacting with H<sub>2</sub>O<sub>2</sub>, the absorbance at 319 nm of Ce<sup>4+</sup> containing solution will decrease. According to the absorbance-H<sub>2</sub>O<sub>2</sub> concentration standard curve, the concentration of H<sub>2</sub>O<sub>2</sub> in the H-type cell was detected.

The Faradaic efficiency (FE) for the electrosynthesis of H<sub>2</sub>O<sub>2</sub> was calculated via the following formula:

$$FE(\%) = \frac{Q_{H_2O_2}}{Q_{tot}} = \frac{2 \times F \times V_{tot} \times [H_2O_2]}{Q_{tot} \times 10^6} \quad (1-3)$$

Where  $F$  is the Faraday constant (in C/mol e<sup>-</sup>), the  $V_{tot}$  is the volume of the cathodic electrolyte (in mL),  $[H_2O_2]$  means the concentration of H<sub>2</sub>O<sub>2</sub> in cathodic cell (in mM), and  $Q_{tot}$  refers to the amount of charge calculated according to the i-t curve (in C).

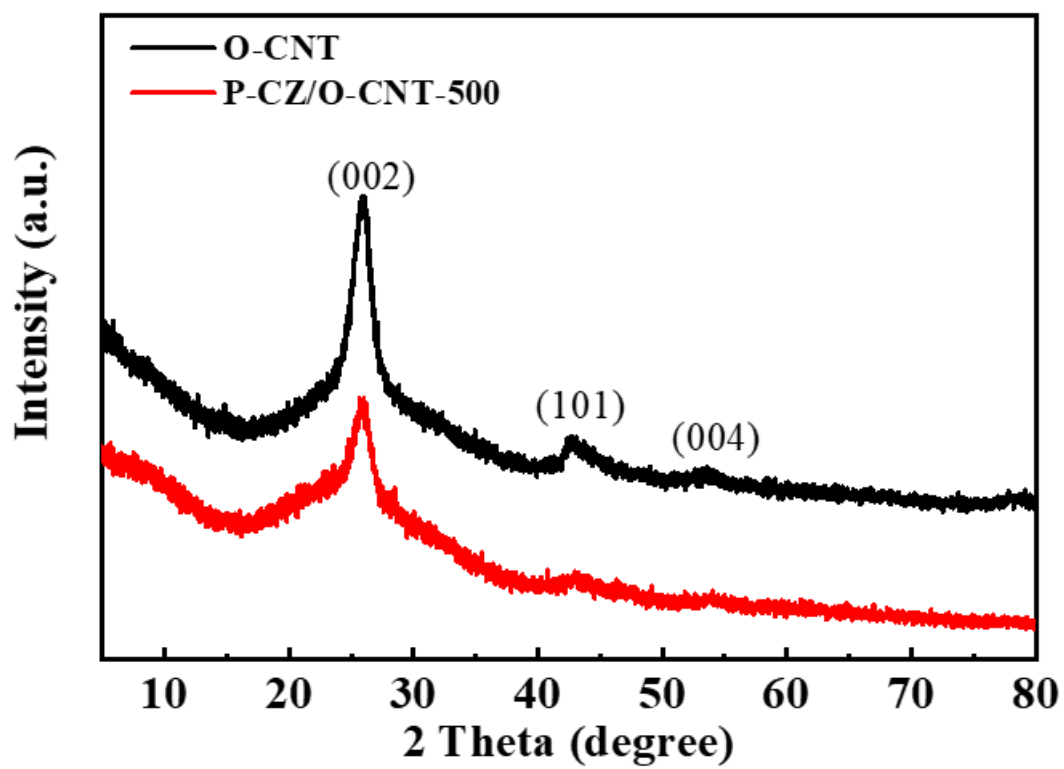

Fig. S1 XRD patterns of P-CZ/O-CNT-500 and O-CNT.

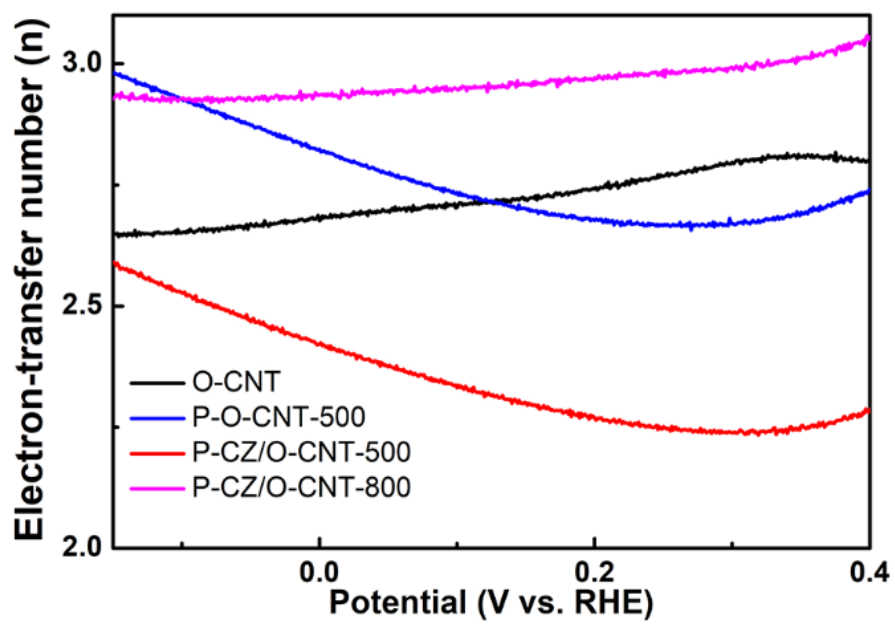

**Fig. S2** Calculated electron transfer number of P-CZ/O-CNT-500 and the control catalysts.

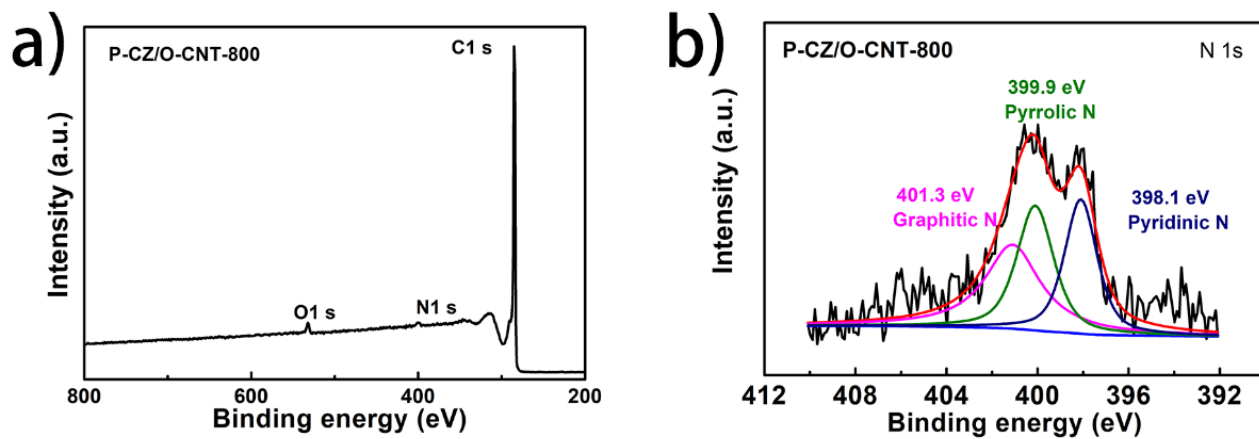

**Fig. S3** (a) XPS survey spectrum, (b) high-resolution N 1s XPS spectrum of P-CZ/O-CNT-800.

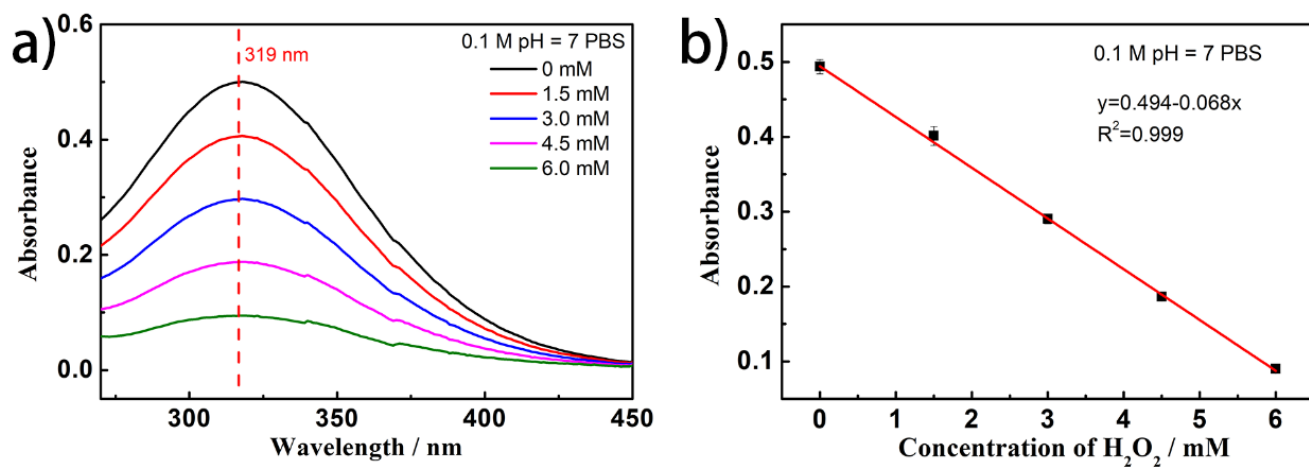

**Fig. S4** (a) Ultraviolet-visible spectra of  $\text{Ce}^{4+}$  solution with different  $\text{H}_2\text{O}_2$  concentrations and (b) the corresponding standard curve.



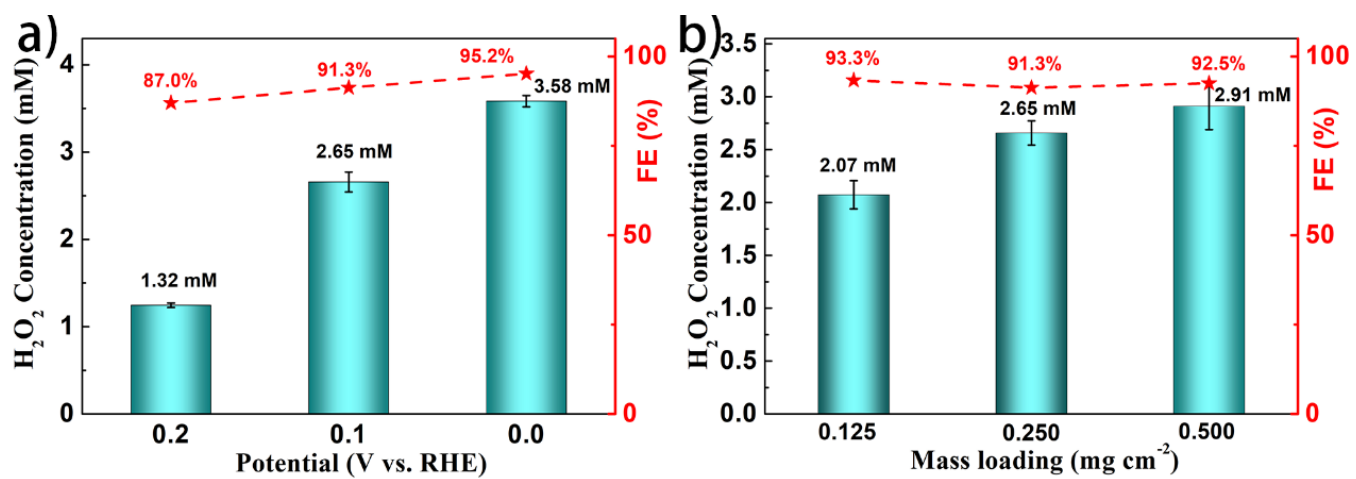

**Fig. S5** Effect of potential (a) and mass loading (b) on the H<sub>2</sub>O<sub>2</sub> concentration and Faradaic efficiency (FE).

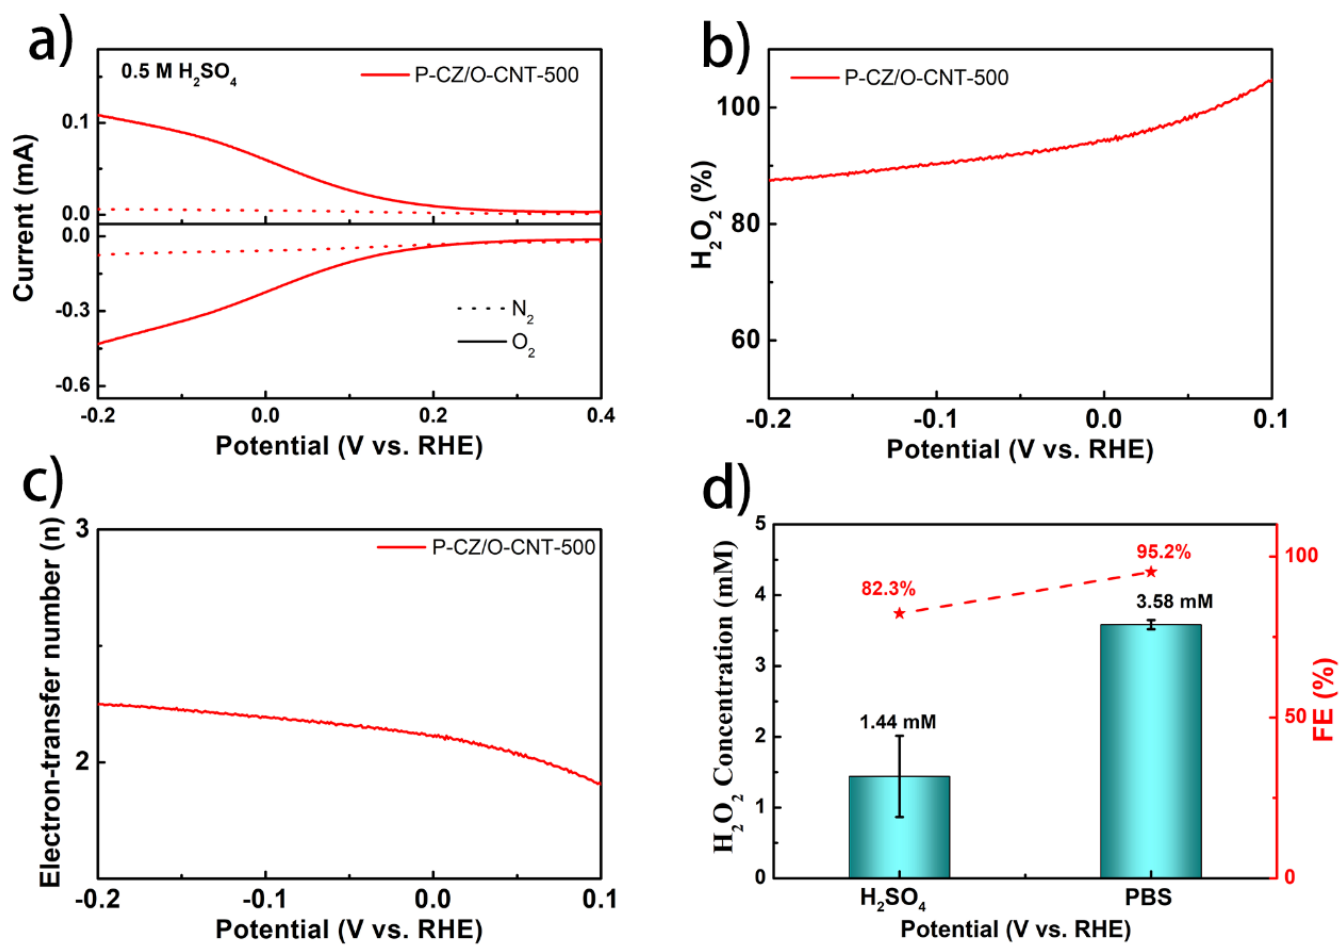

**Fig. S6** (a) LSV curves of P-CZ/O-CNT-500 at the rotation speed of 1600 rpm in N<sub>2</sub> and O<sub>2</sub> saturated 0.5 M H<sub>2</sub>SO<sub>4</sub>, (b) the corresponding H<sub>2</sub>O<sub>2</sub> selectivity and (c) calculated electron transfer number. (d) H<sub>2</sub>O<sub>2</sub> concentration and Faradaic efficiency (FE) tested in H-type cell.
